# Supplementary material for: Dynamic Changes in Microvascular Density Can Predict Viable and Non-Viable Areas in High-Risk Neuroblastoma
Source: MDPI journal article supplement (doi:10.3390/cancers15030917), 2023-02-01
Supplement: s1 [file s1]

## Supplementary Materials

**Table S1.** Table of the values obtained from the systematic uniform random sampling performed to establish the representative amount of regions of interest (ROIs) per patient. Three consecutive values after the 5th ROI were within the 95% confidence interval of the standard error of the mean.

| Regions of interest (ROI) | Mean Vascular density | Average | Standard Error | 95% Confidence Interval |
|---------------------------|-----------------------|---------|----------------|-------------------------|
| ROI 1                     | 0.007                 | 0.006   | 0.0015         | [0.003 – 0.008]         |
| ROI 2                     | 0.004                 | 0.006   | 0.0009         | [0.004 – 0.007]         |
| ROI 3                     | 0.006                 | 0.011   | 0.0056         | [0 – 0.022]             |
| ROI 4                     | 0.028                 | 0.010   | 0.0045         | [0.001 – 0.019]         |
| ROI 5                     | 0.006                 | 0.010   | 0.0037         | [0.002 – 0.017]         |
| ROI 6                     | 0.007                 | 0.009   | 0.0033         | [0.002 – 0.015]         |
| ROI 7                     | 0.003                 | 0.013   | 0.0049         | [0.003 – 0.022]         |

**Table S2.** Summary of the histological subtype for each patient included in the study before and after treatment.

| Patient ID | Histological subtype pre-chemotherapy | Histological subtype post-chemotherapy |
|------------|---------------------------------------|----------------------------------------|
| Patient 1  | Undifferentiated                      | Differentiated                         |
| Patient 2  | Undifferentiated                      | Poorly Differentiated                  |
| Patient 3  | Undifferentiated                      | Non Viable                             |
| Patient 4  | Undifferentiated                      | Ganglioneuroblastoma                   |
| Patient 5  | Undifferentiated                      | Non Viable                             |
| Patient 6  | Undifferentiated                      | Poorly Differentiated                  |
| Patient 7  | Undifferentiated                      | Non Viable                             |
| Patient 8  | Undifferentiated                      | Differentiated                         |
| Patient 9  | Undifferentiated                      | Poorly Differentiated                  |
| Patient 10 | Undifferentiated                      | Poorly Differentiated                  |
| Patient 11 | Poorly Differentiated                 | Non Viable                             |
| Patient 12 | Poorly Differentiated                 | Undifferentiated                       |
| Patient 13 | Poorly Differentiated                 | Poorly Differentiated                  |
| Patient 14 | Poorly Differentiated                 | Poorly Differentiated                  |
| Patient 1  | Undifferentiated                      | Differentiated                         |
| Patient 2  | Undifferentiated                      | Poorly Differentiated                  |
| Patient 3  | Undifferentiated                      | Non Viable                             |
| Patient 4  | Undifferentiated                      | Ganglioneuroblastoma                   |
| Patient 5  | Undifferentiated                      | Non Viable                             |
| Patient 6  | Undifferentiated                      | Poorly Differentiated                  |
| Patient 7  | Undifferentiated                      | Non Viable                             |
| Patient 8  | Undifferentiated                      | Differentiated                         |
| Patient 9  | Undifferentiated                      | Poorly Differentiated                  |
| Patient 10 | Undifferentiated                      | Poorly Differentiated                  |
| Patient 11 | Poorly Differentiated                 | Non Viable                             |
| Patient 12 | Poorly Differentiated                 | Undifferentiated                       |
| Patient 13 | Poorly Differentiated                 | Poorly Differentiated                  |
| Patient 14 | Poorly Differentiated                 | Poorly Differentiated                  |
| Patient 15 | Poorly Differentiated                 | Differentiated                         |
| Patient 16 | Poorly Differentiated                 | Differentiated                         |
| Patient 17 | Poorly Differentiated                 | Differentiated                         |
| Patient 18 | Poorly Differentiated                 | Poorly Differentiated                  |
| Patient 19 | Poorly Differentiated                 | Ganglioneuroblastoma                   |
| Patient 20 | Poorly Differentiated                 | Ganglioneuroblastoma                   |
| Patient 21 | Differentiated                        | Differentiated                         |
| Patient 22 | Differentiated                        | Undifferentiated                       |
| Patient 23 | Differentiated                        | Poorly Differentiated                  |
| Patient 24 | Differentiated                        | Differentiated                         |
| Patient 25 | Differentiated                        | Differentiated                         |
| Patient 26 | Differentiated                        | Differentiated                         |
| Patient 27 | Differentiated                        | Differentiated                         |
| Patient 28 | Differentiated                        | Differentiated                         |
| Patient 29 | Differentiated                        | Poorly Differentiated                  |
| Patient 30 | Differentiated                        | Ganglioneuroblastoma                   |

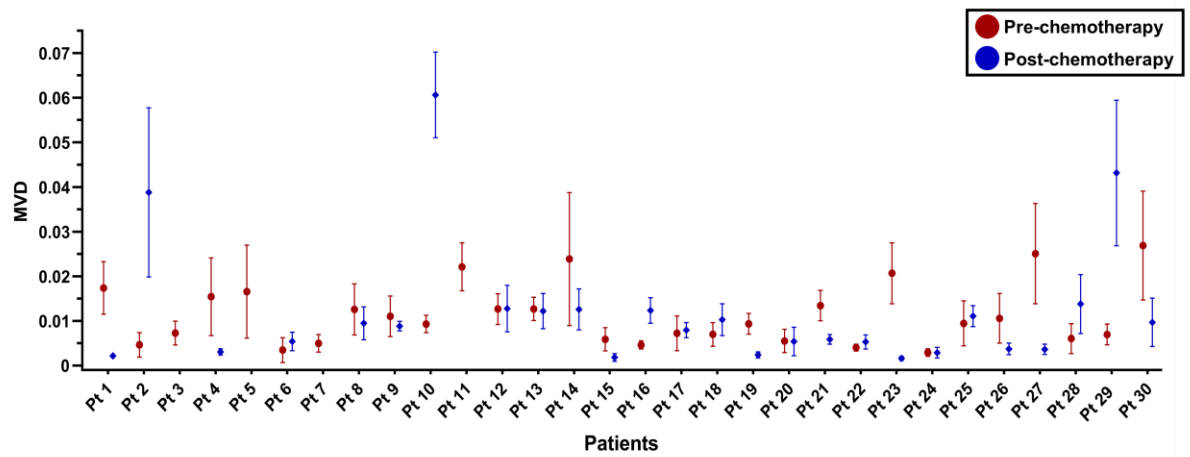

**Figure S1.** Bars showing mean and standard error of the MVD for each patient before (red) and after induction chemotherapy (blue).

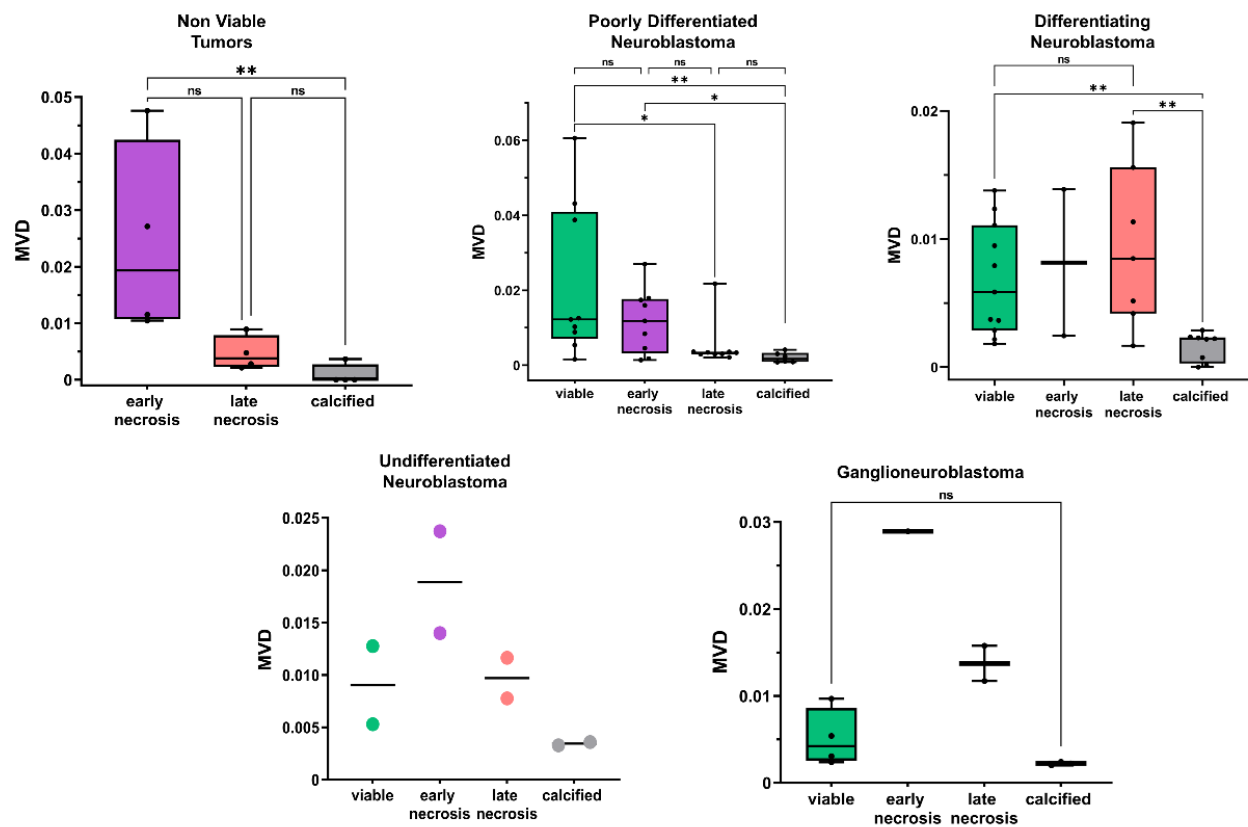

**Figure S2.** Boxplot showing the distribution of patients MVD grouped by histological subtype in viable and non-viable regions after induction chemotherapy. Box represents inter-quartile range. Bars represent 5–95% range. \*p<0.05; \*\*p<0.01
